# Supplementary material for: Generation of Artificial FASTQ Files to Evaluate the Performance of Next-Generation Sequencing Pipelines
Source: PubMed Central journal article supplement (PMC3495771; doi:10.1371/journal.pone.0049110), 2012-11-12
Supplement: pone.0049110.s011.pdf [file pone.0049110.s011.pdf]

**Table S1. Coverage statistics for chromosome 1 regions in which there were a relatively high number of false-positive variant calls**

| Region start and end<br>base positions | Average coverage<br>for a nucleobase | Minimum coverage<br>for a nucleobase | Maximum coverage<br>for a nucleobase | # FP SNPs |
|----------------------------------------|--------------------------------------|--------------------------------------|--------------------------------------|-----------|
| 150150001-60000                        | 32.287                               | 20                                   | 39                                   | 8         |
| 150200001-10000                        | 29.94                                | 9                                    | 38                                   | 14        |
| 150240001-50000                        | 30.84                                | 13                                   | 38                                   | 13        |
| 150550001-60000                        | 30.82                                | 10                                   | 39                                   | 10        |
| 151230001-40000                        | 32.78                                | 17                                   | 38                                   | 8         |
| 151460001-70000                        | 32.04                                | 12                                   | 38                                   | 8         |
| 153890001-900000                       | 30.83                                | 11                                   | 38                                   | 8         |
| 154180001-90000                        | 31.84                                | 18                                   | 38                                   | 10        |
| 154250001-60000                        | 31.52                                | 13                                   | 38                                   | 14        |
| 154420001-30000                        | 31.67                                | 15                                   | 39                                   | 17        |
| 155540001-50000                        | 31.58                                | 17                                   | 38                                   | 15        |

Table 1: Coverage statistics for a sample of regions from chromosome 1 of length 10000 bases which produced a relatively high number of FP variant calls ( $\geq 8$ ). FP=false-positive; PE=00.
