# Supplementary material for: Generation of Artificial FASTQ Files to Evaluate the Performance of Next-Generation Sequencing Pipelines
Source: PubMed Central journal article supplement (PMC3495771; doi:10.1371/journal.pone.0049110), 2012-11-12
Supplement: pone.0049110.s012.pdf [file pone.0049110.s012.pdf]

**Table S2. Broad alignability track results**

| # Bases in view | Region bps     | # Data values | Min | Max | Range | Mean | Var  | SD   |
|-----------------|----------------|---------------|-----|-----|-------|------|------|------|
| 65              | 154421756-820  | 2             | 0   | 0   | 0     | 0    | 0    | 0    |
| 500             | 154421538-2037 | 20            | 0   | 0   | 0     | 0    | 0    | 0    |
| 1000            | 154421288-2287 | 40            | 0   | 1   | 1     | 0.25 | 0.19 | 0.44 |
| 55              | 154428273-328  | 3             | 1   | 1   | 0     | 1    | 0    | 0    |
| 500             | 154428051-550  | 20            | 0   | 1   | 1     | 0.9  | 0.09 | 0.31 |
| 1000            | 154427801-8800 | 40            | 0   | 1   | 1     | 0.7  | 0.22 | 0.46 |
| 247249719       | 1-247249701    | 9889989       | 0   | 1   | 1     | 0.70 | 0.21 | 0.46 |

Table 1: Broad alignability track results for 2 regions containing a cluster of FP SNPs on chromosome 1, and for chromosome 1 as a whole.
